# Supplementary material for: Hydrogen-etched CoS2 to produce a Co9S8@CoS2 heterostructure electrocatalyst for highly efficient oxygen evolution reaction
Source: Royal Society of Chemistry journal article supplement (doi:10.1039/d1ra05677h), 2021-01-01
Supplement: d1ra05677h1.pdf [file d1ra05677h1.pdf]

## Supporting Information

### Hydrogen-Etched $\text{CoS}_2$ to Produce $\text{Co}_9\text{S}_8@\text{CoS}_2$ Heterostructure Electrocatalyst for Highly Efficient Oxygen Evolution Reaction

Yucan Donga, Jiaqi Ran<sup>a</sup>, Qun Liu<sup>a</sup>, Guoqiang Zhang<sup>a</sup>, Xingdong Jiang<sup>a\*</sup> and Daqiang Gao<sup>a</sup>

<sup>a</sup> a Key Laboratory for Magnetism and Magnetic Materials of MOE, Key Laboratory of Special Function Materials and Structure Design of MOE, Lanzhou University, Lanzhou 730000, People's Republic of China.

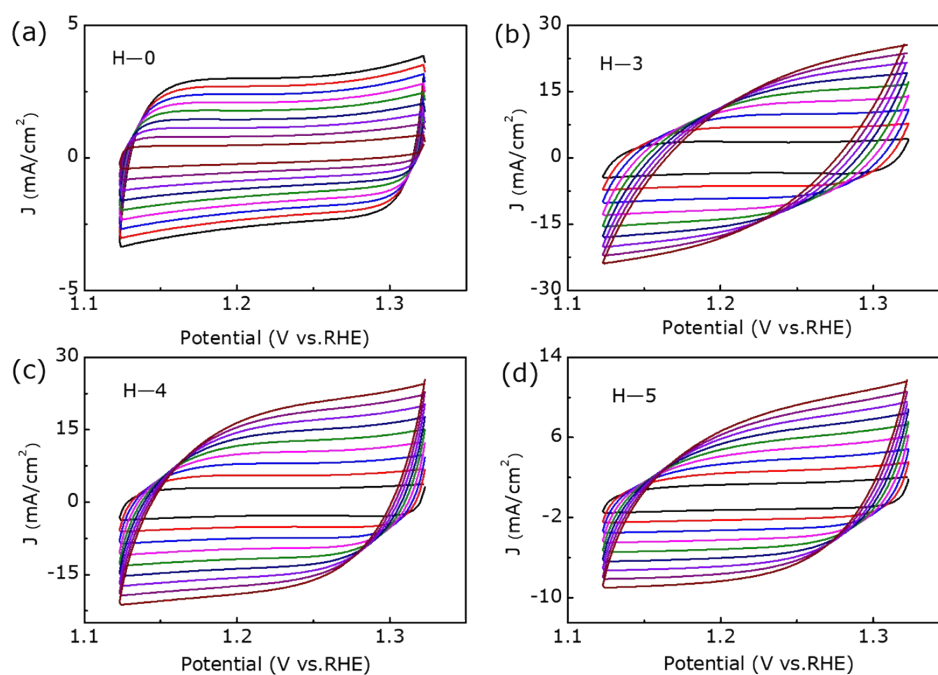

Fig S1. the cyclic voltammetry (CV) curve of (a) H-0, (b) H-3, (c) H-4 and (d) H-5.

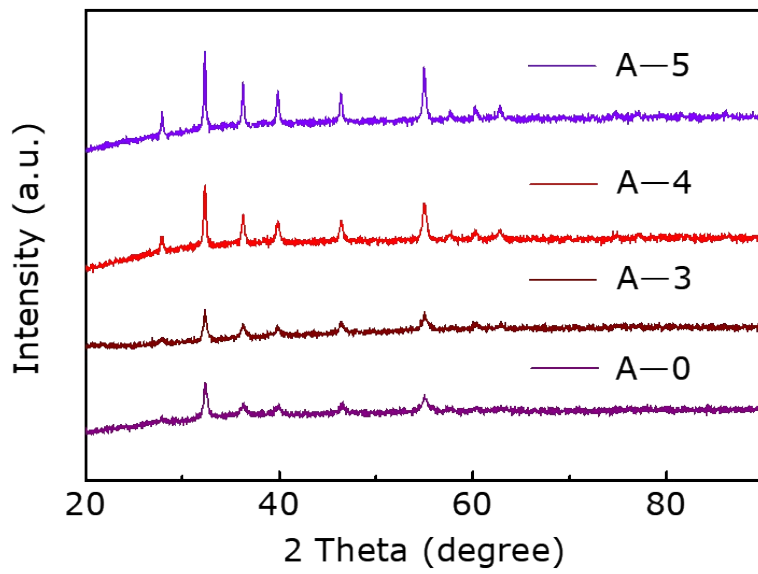

Fig S2. XRD patterns of A-0, A-3, A-4 and A-5.

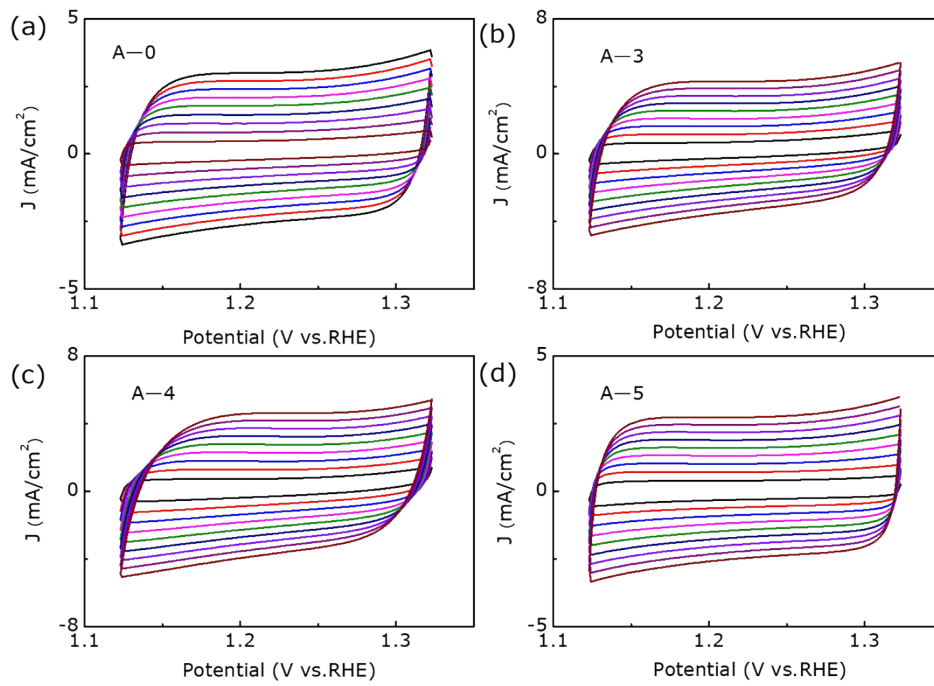

Fig S3. the cyclic voltammetry (CV) curve of (a) A-0, (b) A-3, (c) A-4 and (d) A-5.

Table S1. Comparison of electrocatalytic performance of Co<sub>9</sub>S<sub>8</sub>-CoS<sub>2</sub> with existing OER catalysts.

| Catalyst                                           | Electrolyte    | j (mA cm <sup>-2</sup> ) | □η <sub>1</sub> (mV) | Reference        |
|----------------------------------------------------|----------------|--------------------------|----------------------|------------------|
| <b>Co<sub>9</sub>S<sub>8</sub>@CoS<sub>2</sub></b> | <b>1 M KOH</b> | <b>50</b>                | <b>396</b>           | <b>This work</b> |
| CoP-N/Co foam                                      | 1 M KOH        | 50                       | 260                  | 1                |
| S-NiCoFe                                           | 1 M KOH        | 100                      | 258                  | 2                |
| Co <sub>3</sub> O <sub>4</sub> @GF_O <sub>3</sub>  | 1 M KOH        | 10                       | 450                  | 3                |
| Co <sub>3</sub> O <sub>4</sub> nanocubes/graphene  | 1 M KOH        | 10                       | 400                  | 4                |
| Co <sub>9</sub> S <sub>8</sub> /G                  | 0.1 M KOH      | 10                       | 441                  | 5                |
| Co@Co <sub>3</sub> O <sub>4</sub> /NC              | 0.1 M KOH      | 10                       | 410                  | 6                |
| Ni <sub>0.3</sub> Co <sub>0.7</sub> O              | 1 M KOH        | 10                       | 450                  | 7                |
| Ni-Co-S/CF                                         | 1 M KOH        | 100                      | 363                  | 8                |

#### Reference

1. Z. Liu, X. Yu, H. Xue, L. Feng, *J. Mater. Chem. A.*, 2019, **7**, 13242-13248.
2. V. Ganesan, P. Ramasamy, J. Kim, *Int. J. Hydrogen Energy.*, 2017, **42**, 5985- 5992.
3. M. P. Araújo, M. Nunes, I. M. Rocha, M. F. R. Pereira, C. Freire, *Chemistry Select*, 2018, **3**, 10064-10076.
4. P. Zhang, X. Han, H. Hu, J. Gui, M. Li and J. Qiu, *Catal. Commun.*, 2017, **88**, 81-84.
5. S. Dou, L. Tao, J. Huo, S. Wang, L. Dai, *Energy Environ. Sci.*, 2016, **9**, 1320-1326.
6. A. Aijaz, J. Masa, C. Rösler, W. Xia, P. Weide, A. J. R. Botz, R. A. Fischer, W. Schuhmann, M. Muhler, *Angew. Chem. Int. Ed.*, 2016, **55**, 4087–4091.
7. R. Mondal, H. Ratnawat, S. Kumar, A. Kumar, P. Singh, *RSC Adv.*, 2020, **10**, 17845-17853.
8. T. Liu, X. Sun, A. M. Asiri, Y. He, *Int. J. Hydrogen Energy*, 2016, **41**, 7264-7269.
